# Supplementary material for: Long non-coding RNA UCA1 induces non-T790M acquired resistance to EGFR-TKIs by activating the AKT/mTOR pathway in EGFR-mutant non-small cell lung cancer
Source: PubMed Central journal article supplement (PMC4695138; doi:10.18632/oncotarget.4361), 2015-06-08
Supplement: oncotarget-06-23582-s001.pdf [file oncotarget-06-23582-s001.pdf]

**Long non-coding RNA *UCA1* induces non-T790M acquired resistance to EGFR-TKIs by activating the AKT/mTOR pathway in *EGFR*-mutant non-small cell lung cancer**

**Supplementary Material**

**Supplementary Table S1. Progression free survival (PFS) cut-off point analysis of *UCA1*.**

| Cut-off point |        | PFS      |                     |       |
|---------------|--------|----------|---------------------|-------|
|               |        | Log-Rank | HR(95%CI)           | P     |
| 10            | 0.0081 | 0.03     | 6.185(0.809-47.265) | 0.079 |
| 15            | 0.0124 | 0.047    | 3.667(0.834-16.117) | 0.085 |
| 20            | 0.0192 | 0.047    | 3.667(0.834-16.117) | 0.085 |
| 25            | 0.0285 | 0.059    | 2.638(0.86-8.089)   | 0.09  |
| 30            | 0.0408 | 0.028    | 2.759(1.01-7.538)   | 0.048 |
| 35            | 0.045  | 0.048    | 2.359(0.927-6.009)  | 0.072 |
| 40            | 0.055  | 0.041    | 2.191(0.971-4.942)  | 0.059 |
| 45            | 0.068  | 0.007    | 3.339(1.281-8.699)  | 0.014 |
| 50            | 0.087  | 0.241    | 1.807(0.635-5.139)  | 0.267 |
| 55            | 0.0924 | 0.591    | 1.342(0.437-4.127)  | 0.608 |
| 60            | 0.1267 | 0.581    | 1.352(0.44-4.156)   | 0.598 |
| 65            | 0.1683 | 0.636    | 0.712(0.163-3.112)  | 0.652 |
| 70            | 0.2242 | 0.636    | 0.712(0.163-3.112)  | 0.652 |
| 75            | 0.2588 | 0.195    | 1.39(0.307-6.294)   | 0.669 |
| 80            | 0.3134 | 0.754    | 0.73(0.095-5.622)   | 0.763 |
| 85            | 0.4357 | 0.941    | 1.078(0.138-8.402)  | 0.943 |
| 90            | 0.6095 | 0.941    | 1.078(0.138-8.402)  | 0.943 |

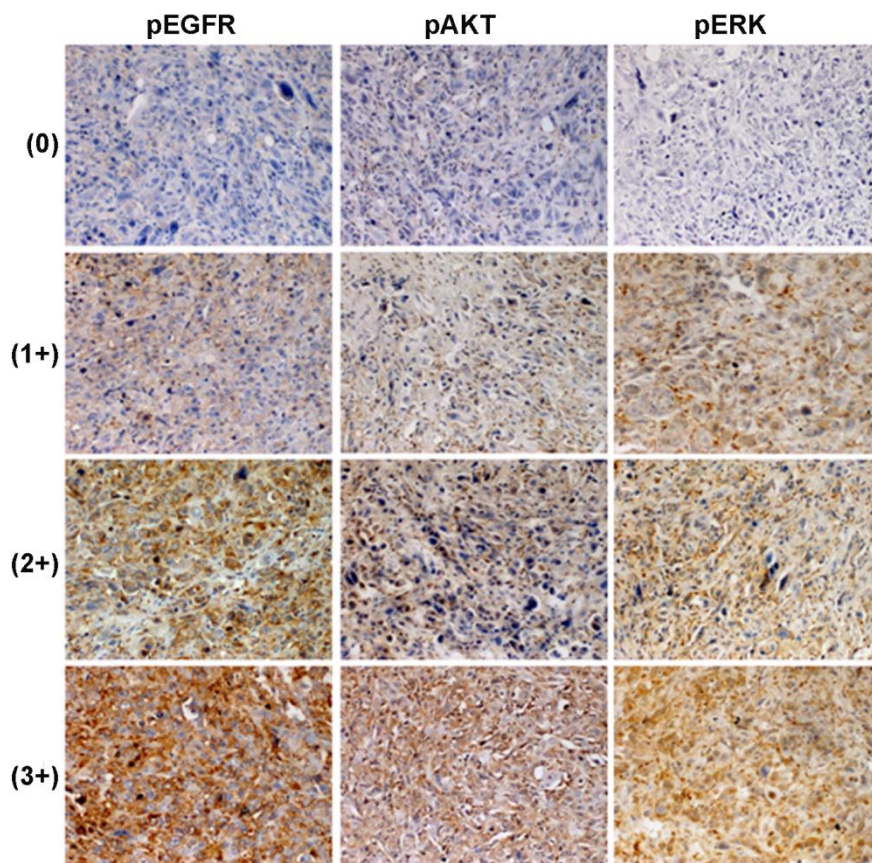

**Supplementary Figure 1:**

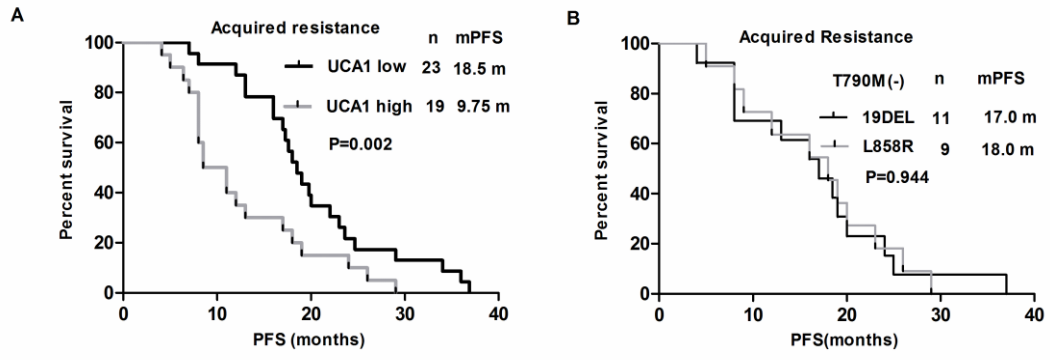

**Supplementary Figure 2:**

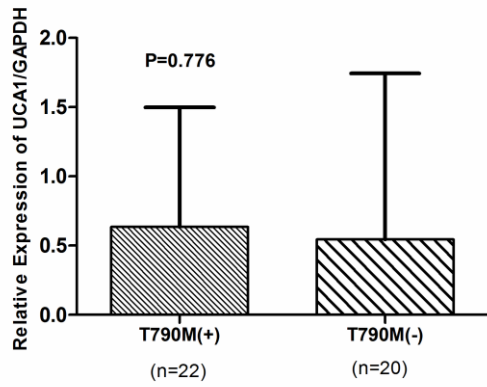

Supplementary Figure 3:

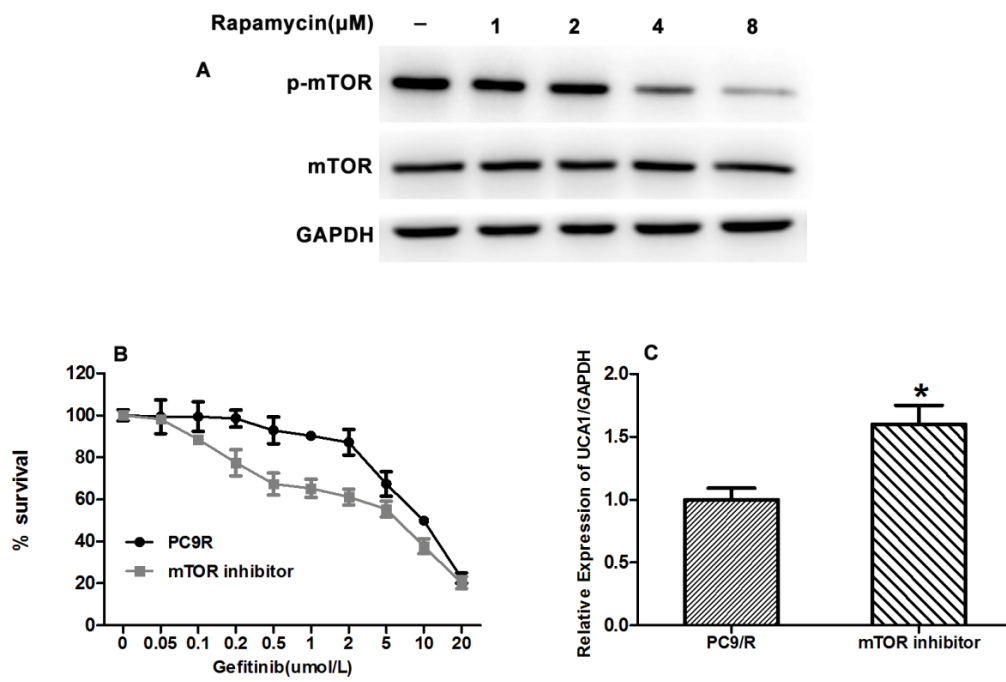

Supplementary Figure 4:
